# Supplementary material
Source: PubMed Central journal article supplement (PMC9552478)
Supplement: 12916_2022_2541_MOESM1_ESM.pdf [file 12916_2022_2541_MOESM1_ESM.pdf]

**Table S1: Study settings**

|                                                             | <b>DRC</b>                                                                                                                                                                              | <b>Nigeria</b>                                                                                                                                                                                                                                             | <b>Uganda</b>                                                                                                                                                                   |
|-------------------------------------------------------------|-----------------------------------------------------------------------------------------------------------------------------------------------------------------------------------------|------------------------------------------------------------------------------------------------------------------------------------------------------------------------------------------------------------------------------------------------------------|---------------------------------------------------------------------------------------------------------------------------------------------------------------------------------|
| <b>Population (children &lt;5 years)</b>                    |                                                                                                                                                                                         |                                                                                                                                                                                                                                                            |                                                                                                                                                                                 |
|                                                             | <i>Health Zone</i>                                                                                                                                                                      | <i>Local Government Area</i>                                                                                                                                                                                                                               | <i>District</i>                                                                                                                                                                 |
|                                                             | Ipamu: 284'484 (52'523)                                                                                                                                                                 | Fufore: 280'660 (49'982)                                                                                                                                                                                                                                   | Kole: 298'394 (59'184)                                                                                                                                                          |
|                                                             | Kenge: 382'232 (70'567)                                                                                                                                                                 | Mayo-Belwa: 204'746 (33'101)                                                                                                                                                                                                                               | Kwania: 232'402 (48'582)                                                                                                                                                        |
|                                                             | Kingandu: 119'251 (22'016)                                                                                                                                                              | Song: 261'543 (47'347)                                                                                                                                                                                                                                     | Oyam: 465'190 (92'752)                                                                                                                                                          |
|                                                             | Total: 785'968 (145'107)                                                                                                                                                                | Total: 746'949 (130'430)                                                                                                                                                                                                                                   | Total: 995'986 (200'518)                                                                                                                                                        |
| Source                                                      | <a href="https://www.worldpop.org">https://www.worldpop.org</a>                                                                                                                         |                                                                                                                                                                                                                                                            |                                                                                                                                                                                 |
| <b>Public health care providers*</b>                        |                                                                                                                                                                                         |                                                                                                                                                                                                                                                            |                                                                                                                                                                                 |
| Community Health Workers                                    | Site de Soins Communautaires (Community Care Site)<br>(N = 42)                                                                                                                          | Community-Oriented Resource Person (CORP)<br>(N = 500)                                                                                                                                                                                                     | Village Health Team (VHT) members<br>(N = 5,100)                                                                                                                                |
| Primary Health Care                                         | Poste de Santé (Health Post)<br>Centre de Santé (Health Centre)<br>(N = 152)                                                                                                            | Health Post**<br>Primary Health Centre (PHC)<br>(N = 77)                                                                                                                                                                                                   | Health Centre II (HC II)<br>(N = 30)                                                                                                                                            |
| Referral Facilities                                         | Centre de Santé de Référence (Referral Health Centre) and Hôpital Général de Référence (General Referral Hospital)<br>(N = 19)                                                          | Cottage Hospital<br>(N = 3)                                                                                                                                                                                                                                | Health Centre III (HC III), Health Centre IV (HC IV) and Hospital<br>(N = 20)                                                                                                   |
| <b>General danger signs as per national iCCM guidelines</b> |                                                                                                                                                                                         |                                                                                                                                                                                                                                                            |                                                                                                                                                                                 |
|                                                             | <ul style="list-style-type: none"> <li>- Unusually sleepy or unconscious</li> <li>- Not able to drink or feed anything</li> <li>- Vomiting everything</li> <li>- Convulsions</li> </ul> | <ul style="list-style-type: none"> <li>- Unusually sleepy or unconscious</li> <li>- Not able to drink or feed anything</li> <li>- Vomiting everything</li> <li>- Convulsions</li> <li>- Not responding to ACT</li> <li>- Yellowness of the eyes</li> </ul> | <ul style="list-style-type: none"> <li>- Very sleepy or unconscious</li> <li>- Not able to breastfeed or drink</li> <li>- Vomiting everything</li> <li>- Convulsions</li> </ul> |

\*Number of providers at the beginning of the study period. \*\*Health posts were upgraded to Primary Health Centres during the study period.

**Table S2: Adjusted regression estimates, overall and restricted to pre-Covid-19 period (before April 2020)**

| <b>A) Dead at follow-up</b>                                        | <b>DRC</b>                             |                     | <b>Nigeria</b>                         |                     | <b>Uganda</b>                          |                     |
|--------------------------------------------------------------------|----------------------------------------|---------------------|----------------------------------------|---------------------|----------------------------------------|---------------------|
|                                                                    | <b>Covariate</b>                       | <b>aOR (95% CI)</b> | <b>Covariate</b>                       | <b>aOR (95% CI)</b> | <b>Covariate</b>                       | <b>OR (95% CI)</b>  |
| RAS use adjusted for basic covariates* and referral and treatment  | RAS use                                | 3.06 (1.35-6.92)    | RAS use                                | 2.16 (1.11-4.21)    | RAS use <sup>§</sup>                   | 0.70 (0.29-1.74)    |
|                                                                    | <i>Pre-Covid-19 only:</i> <sup>#</sup> |                     | <i>Pre-Covid-19 only:</i> <sup>#</sup> |                     | <i>Pre-Covid-19 only:</i> <sup>#</sup> |                     |
|                                                                    | RAS use                                | 3.32 (1.39-7.92)    | RAS use                                | 2.18 (0.90-5.27)    | RAS use <sup>§</sup>                   | 0.75 (0.29-1.93)    |
| <b>B) Dead or sick at follow-up</b>                                | <b>DRC</b>                             |                     | <b>Nigeria</b>                         |                     | <b>Uganda</b>                          |                     |
|                                                                    | <b>Covariate</b>                       | <b>aOR (95% CI)</b> | <b>Covariate</b>                       | <b>aOR (95% CI)</b> | <b>Covariate</b>                       | <b>aOR (95% CI)</b> |
| RAS use adjusted for basic covariates** and referral and treatment | RAS use                                | 0.88 (0.59-1.32)    | RAS use                                | 1.42 (0.85-2.36)    | RAS use                                | 0.60 (0.45-0.79)    |
|                                                                    | <i>Pre-Covid-19 only:</i> <sup>#</sup> |                     | <i>Pre-Covid-19 only:</i> <sup>#</sup> |                     | <i>Pre-Covid-19 only:</i> <sup>#</sup> |                     |
|                                                                    | RAS use                                | 0.84 (0.55-1.29)    | RAS use                                | 1.45 (0.78-2.68)    | RAS use                                | 0.64 (0.48-0.88)    |

\*Fixed effects, DRC: sex, age <1 year, beginning of RAS roll-out, convulsions, enrolment location (CHW vs. PHC), rainy season; Nigeria: convulsions, enrolment location (CHW vs. PHC); random effect: enrolling provider (all countries)

\*\*Fixed effects, DRC: sex, age <1 year, beginning of RAS roll-out, convulsions, enrolment location (CHW vs. PHC), rainy season, health zone, Nigeria: convulsions, enrolment location (CHW vs. PHC); Uganda: sex, age <1 year, beginning of RAS roll-out, No. danger signs (1-2, 3-4), rainy season, district; random effect: enrolling provider (all countries)

<sup>§</sup>No adjusted models were calculated due to insufficient number of events (death)

<sup>#</sup>Pre-Covid-19: DRC N = 1548, Nigeria N = 475, Uganda N = 3268. RAS = rectal artesunate
