# Supplementary material
Source: PubMed Central journal article supplement (PMC9552478)
Supplement: 12916_2022_2541_MOESM2_ESM.pdf [file 12916_2022_2541_MOESM2_ESM.pdf]

Figure S1: Inclusion flow-charts

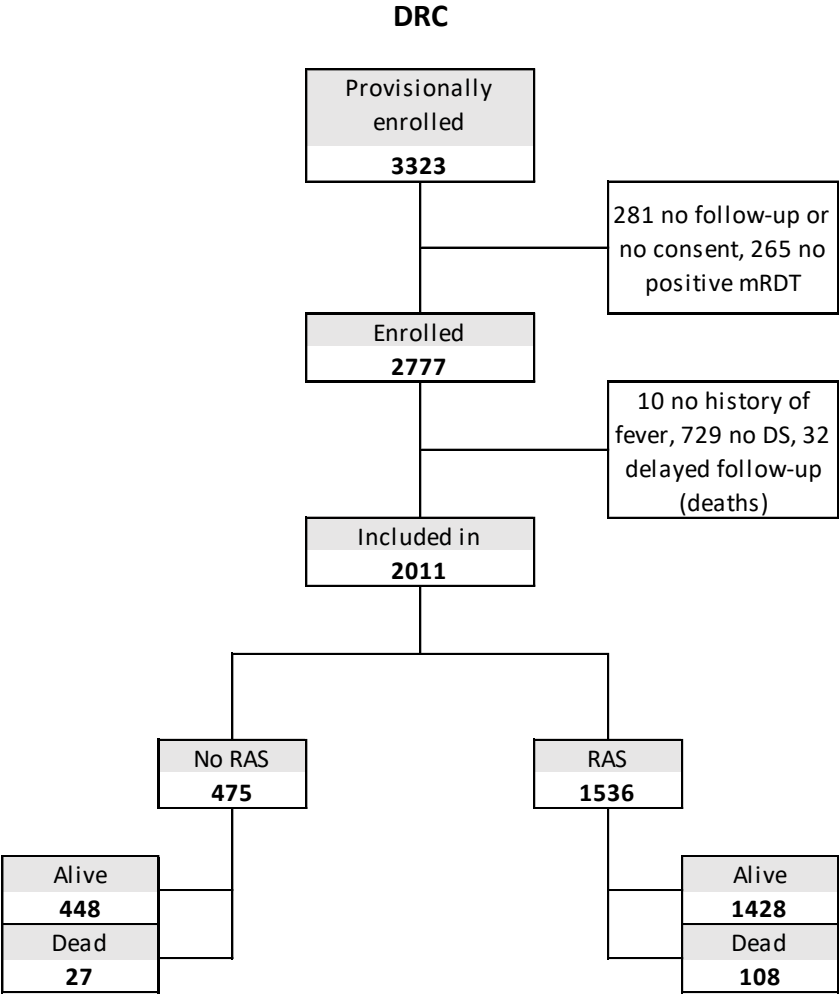

# Nigeria

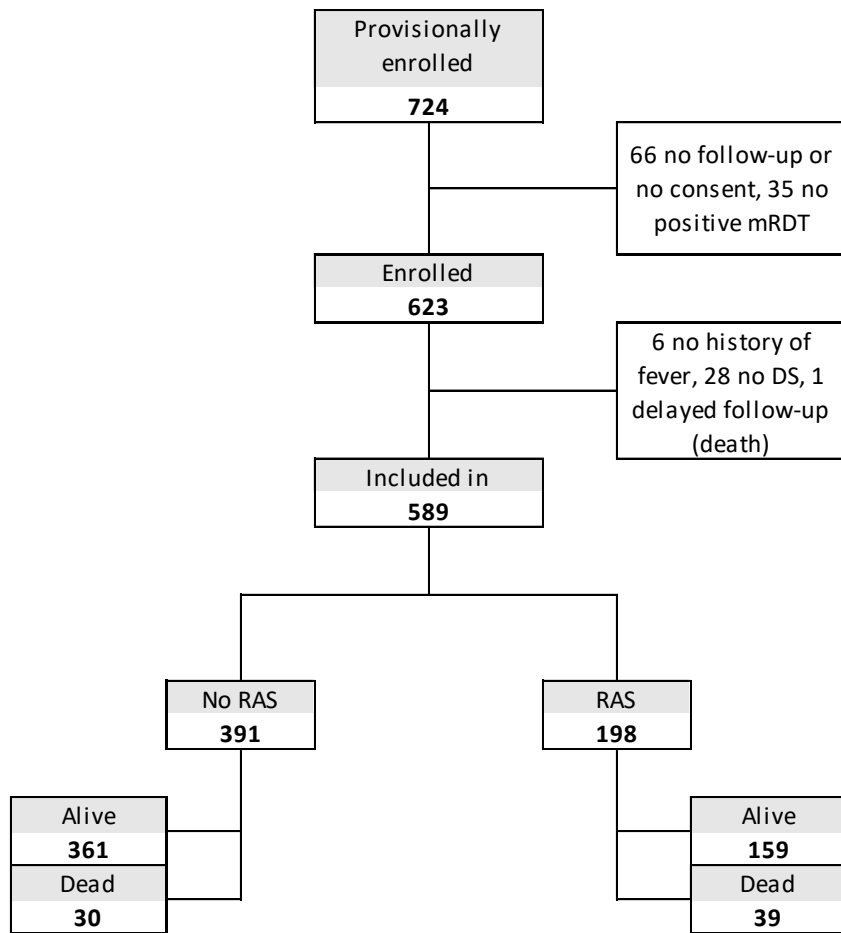

# Uganda

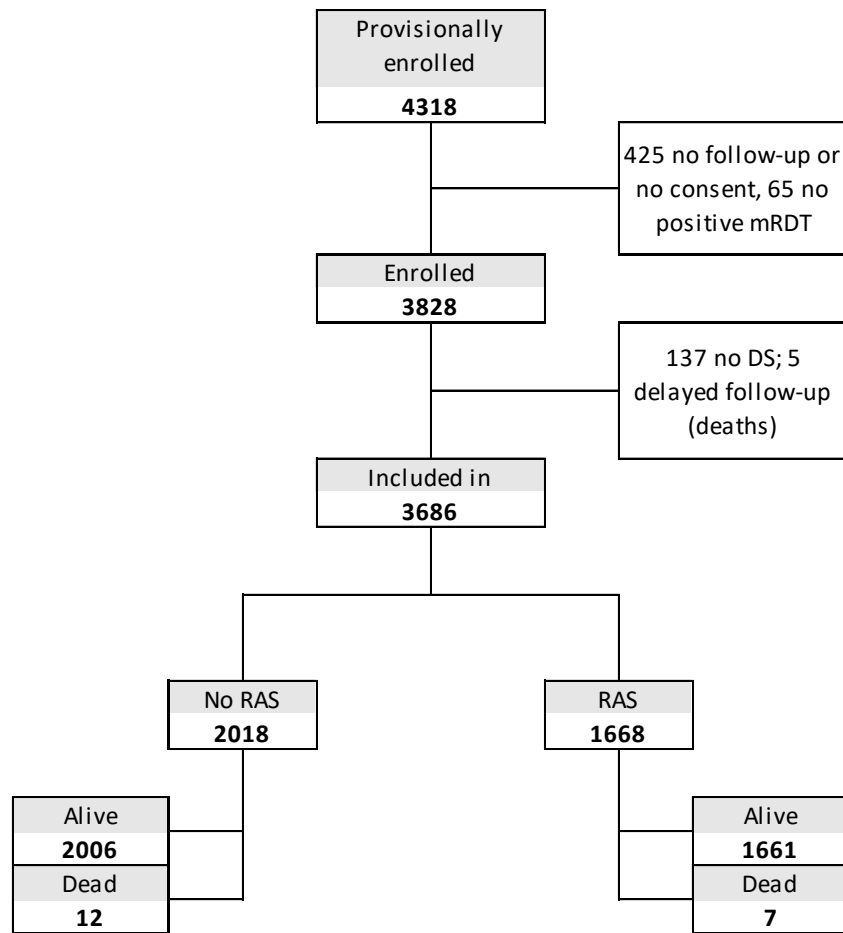

**Figure S2: Complementary day 28 health outcome indicators, by country**

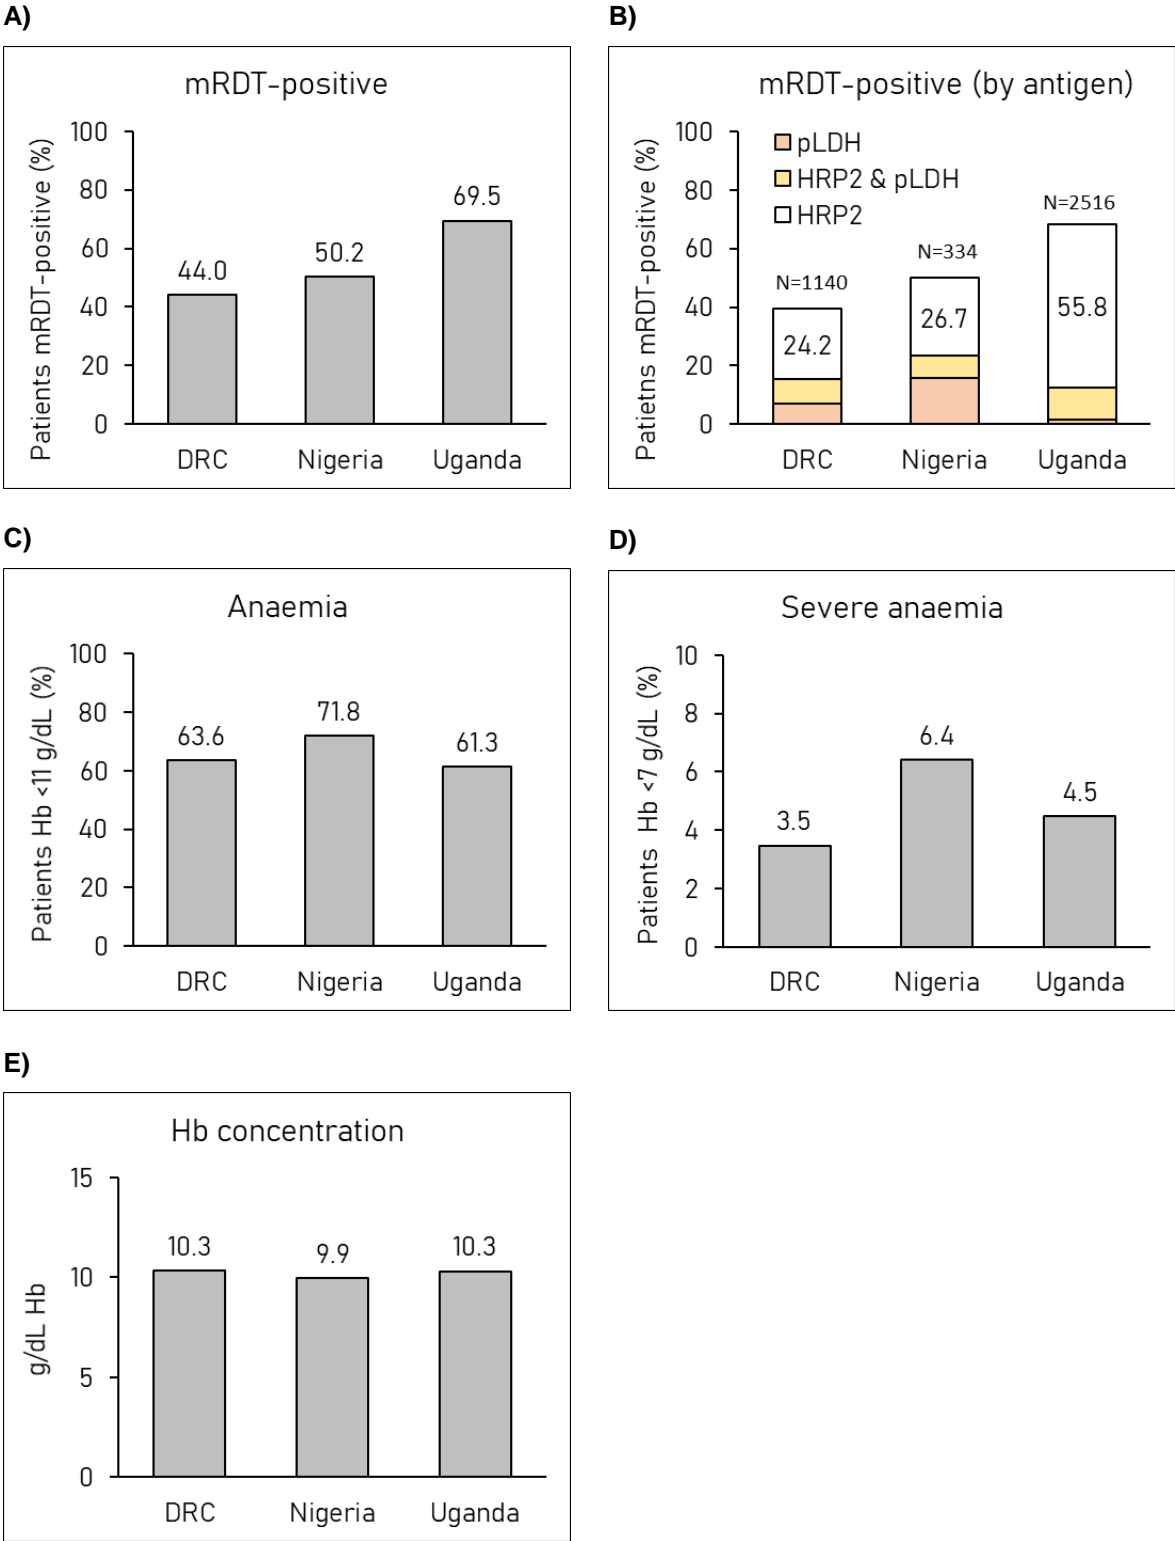

Reference for definitions of anaemia and severe anaemia in C) and D): WHO. Haemoglobin concentrations for the diagnosis of anaemia and assessment of severity. Vitamin and Mineral Nutrition Information System. Geneva, World Health Organization, 2011 (WHO/NMH/NHD/MNM/11.1).

**Figure S3: Results of HRP2/pLDH Combo tests at day 28 follow-up, by detected antigen (HRP2 and/or pLDH), in a sub-sample of study patients**

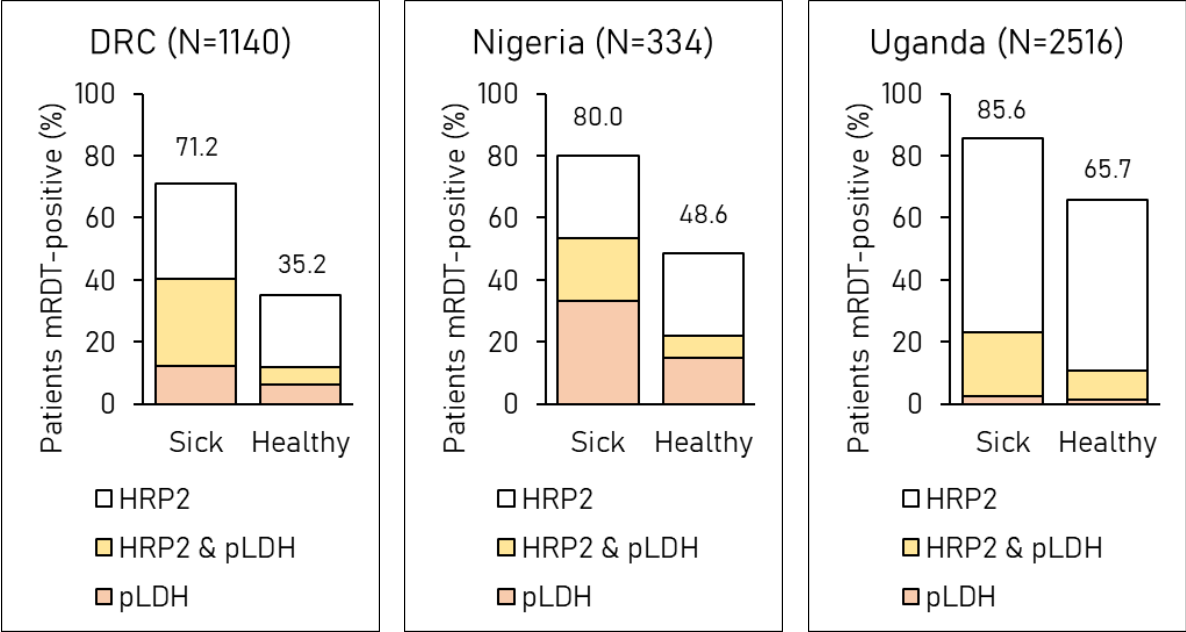

**Proportion HRP2 only out of all with positive mRDT**

DRC: healthy 66.2% vs. sick 43.4%,  $p < 0.001$   
 Nigeria: healthy 54.8% vs. sick 33.3%,  $p = 0.15$   
 Uganda: healthy 83.4% vs. sick 73.0%,  $p < 0.001$

**Figure S4: Mean haemoglobin (Hb) concentration and percent of children with anaemia (Hb <11 g/dL) among children sick or healthy at follow-up**

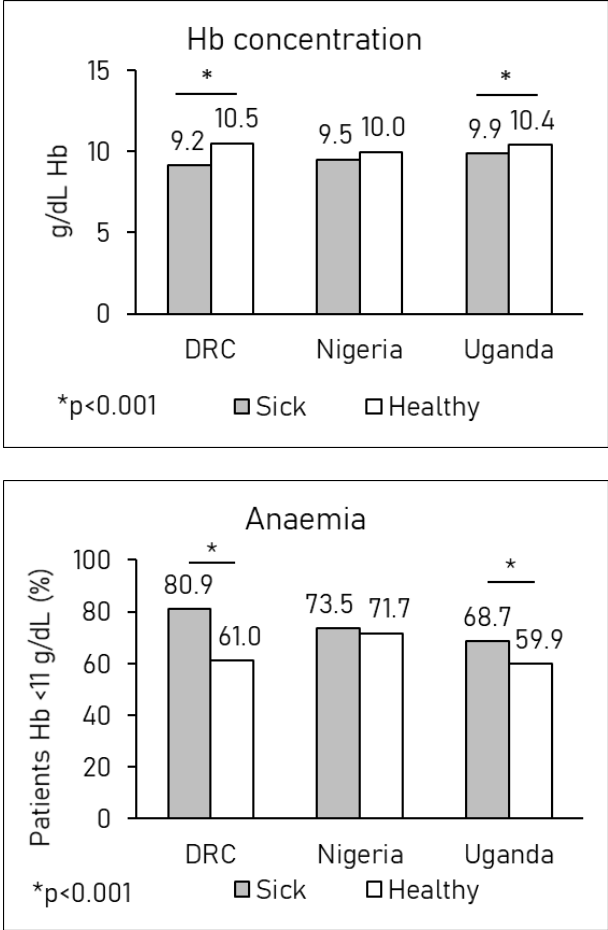

Reference for definitions of anaemia and severe anaemia: WHO. Haemoglobin concentrations for the diagnosis of anaemia and assessment of severity. Vitamin and Mineral Nutrition Information System. Geneva, World Health Organization, 2011 (WHO/NMH/NHD/MNM/11.1).

**Figure S5: (A) Time trend in monthly inclusions and case fatality ratio (CFR) displayed as 3-month moving average, by type of enrolling provider, and (B) overall CFR by enrolling provider**

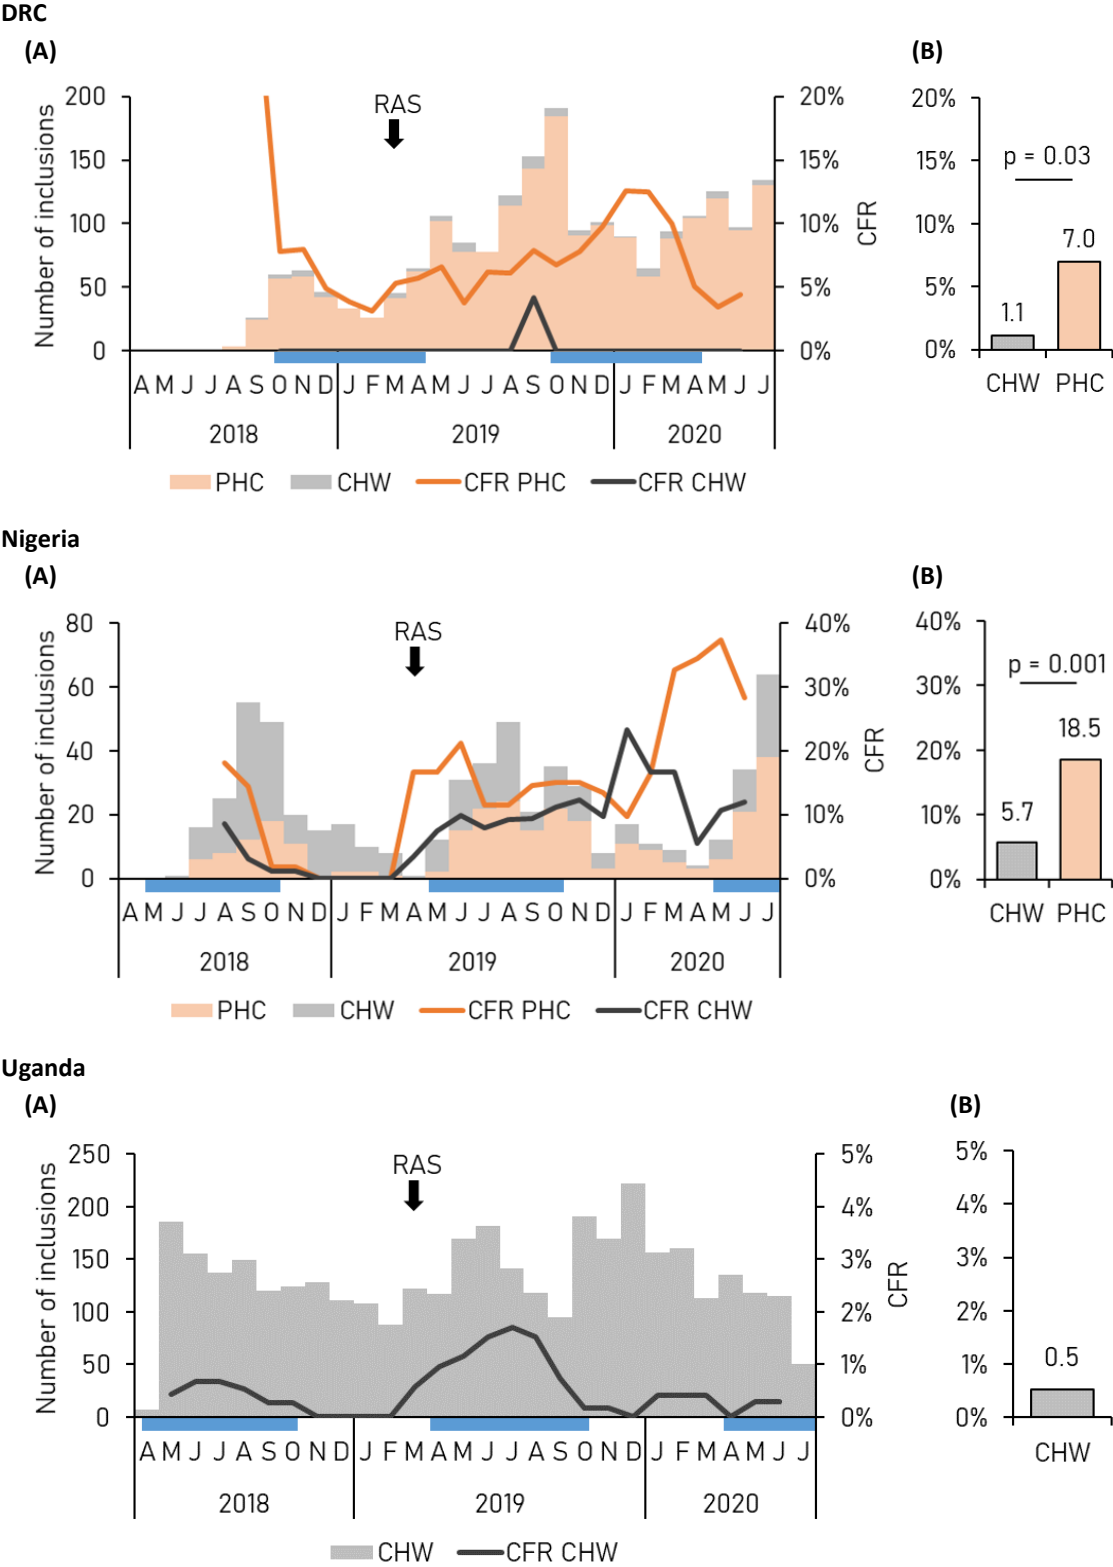

CHW = community health worker, PHC = primary health centre  
Horizontal blue bars denote the rainy season

Figure S5
